# Supplementary material for: Asymmetric Janus functionalization induced magnetization and switchable out-of-plane polarization in 2D MXene Mo2CXX′
Source: Royal Society of Chemistry journal article supplement (doi:10.1039/d2cp05668b), 2023-01-01
Supplement: d2cp05668b1.pdf [file d2cp05668b1.pdf]

## Supporting Information

### Asymmetric Janus functionalization induced magnetization and switchable out-of-plane polarization in 2D MXene $\text{Mo}_2\text{CXX}'$

Chao Xin,<sup>\*a,b</sup> Zhen Fan,<sup>a</sup> Zhixin Sun,<sup>a</sup> Hui Li,<sup>a</sup> Guangyong Jin,<sup>a</sup> Feng Pan,<sup>\*b</sup> and Yu Sui,<sup>\*c</sup>

<sup>a</sup> School of Science, Changchun University of Science and Technology, Jilin Key Laboratory of Solid-state Laser Technology and Application, Changchun 130022, China

<sup>b</sup> School of Advanced Materials, Peking University Shenzhen Graduate School, Shenzhen 518055, China

<sup>c</sup> Department of Physics, Harbin Institute of Technology, Harbin 150001, China

#### Figures:

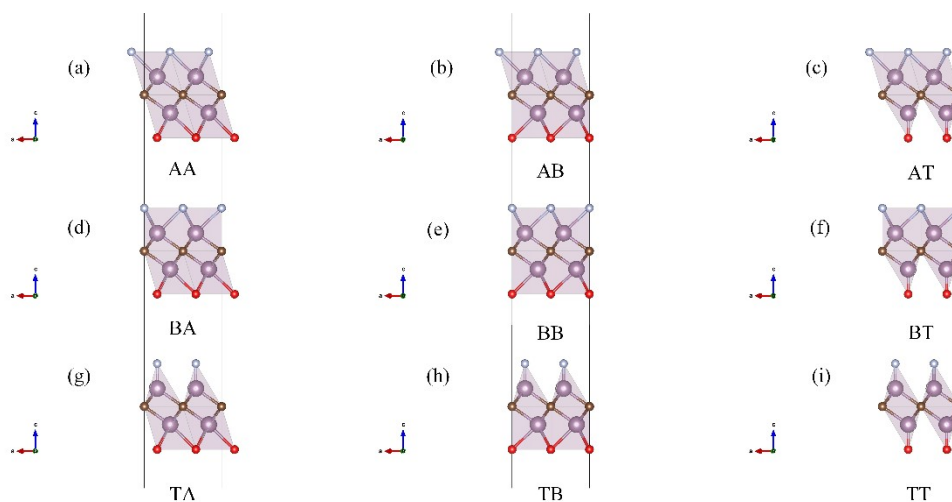

**Figure ES11.** Side views of  $\text{Mo}_2\text{C-FO}$  MXene lattice. There are nine possible sites for X atoms decoration on each side of the Janus surface.

\* Corresponding author. *E-mail addresses:*

[xinchao@pkusz.edu.cn](mailto:xinchao@pkusz.edu.cn); [suiyu@hit.edu.cn](mailto:suiyu@hit.edu.cn); [panfeng@pkusz.edu.cn](mailto:panfeng@pkusz.edu.cn).

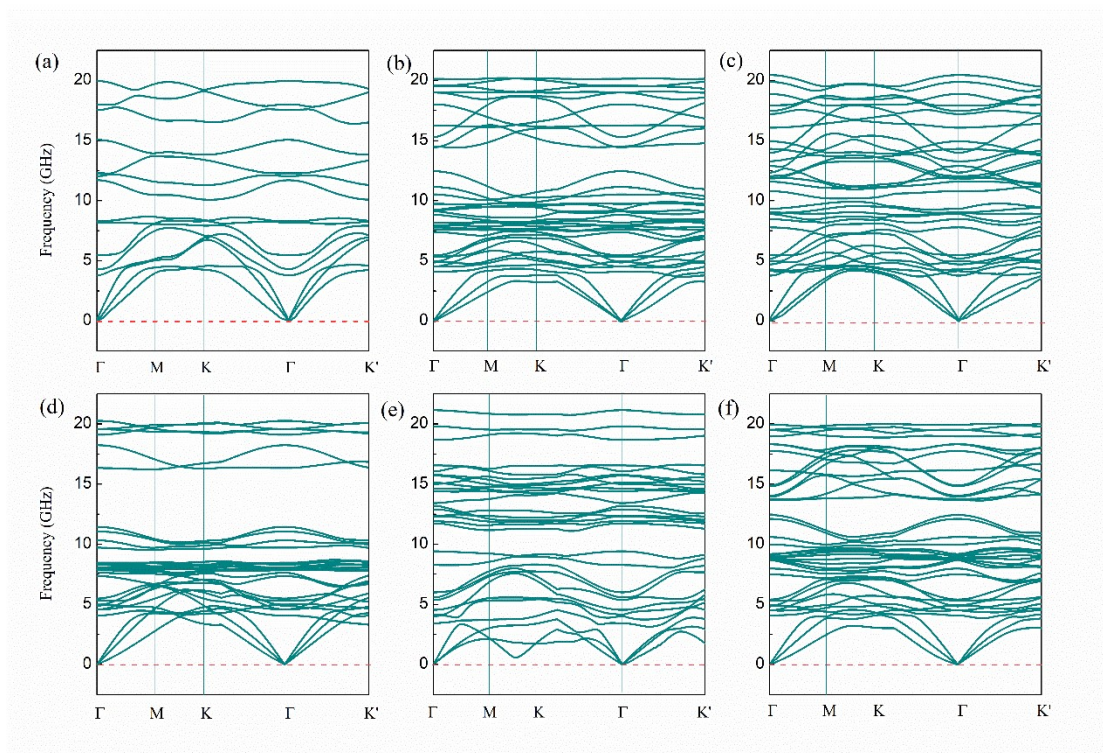

**Figure ESI2.** The phonon spectra for (a)  $\text{Mo}_2\text{C-F-O}$ ; (b)  $\text{Mo}_2\text{C-F-OH}$ ; (c)  $\text{Mo}_2\text{C-O-OH}$ ; (d)  $\text{Mo}_2\text{C-F}_2$ ; (e)  $\text{Mo}_2\text{C-O}_2$ ; (f)  $\text{Mo}_2\text{C-(OH)}_2$ .

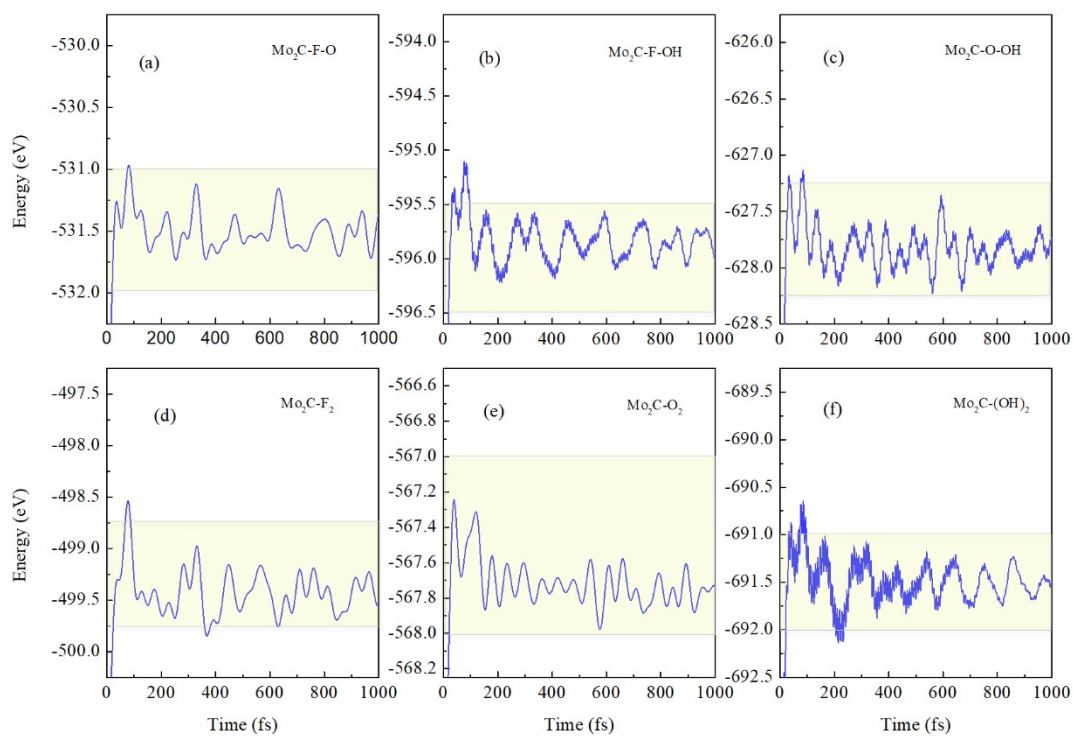

**Figure ESI3.** Variations of the total free energy of Janus during ab initio molecular dynamics simulations at 300 K. (a)  $\text{Mo}_2\text{C-F-O}$ ; (b)  $\text{Mo}_2\text{C-F-OH}$ ; (c)  $\text{Mo}_2\text{C-O-OH}$ ; (d)  $\text{Mo}_2\text{C-F}_2$ ; (e)  $\text{Mo}_2\text{C-O}_2$ ; (f)  $\text{Mo}_2\text{C-(OH)}_2$ .

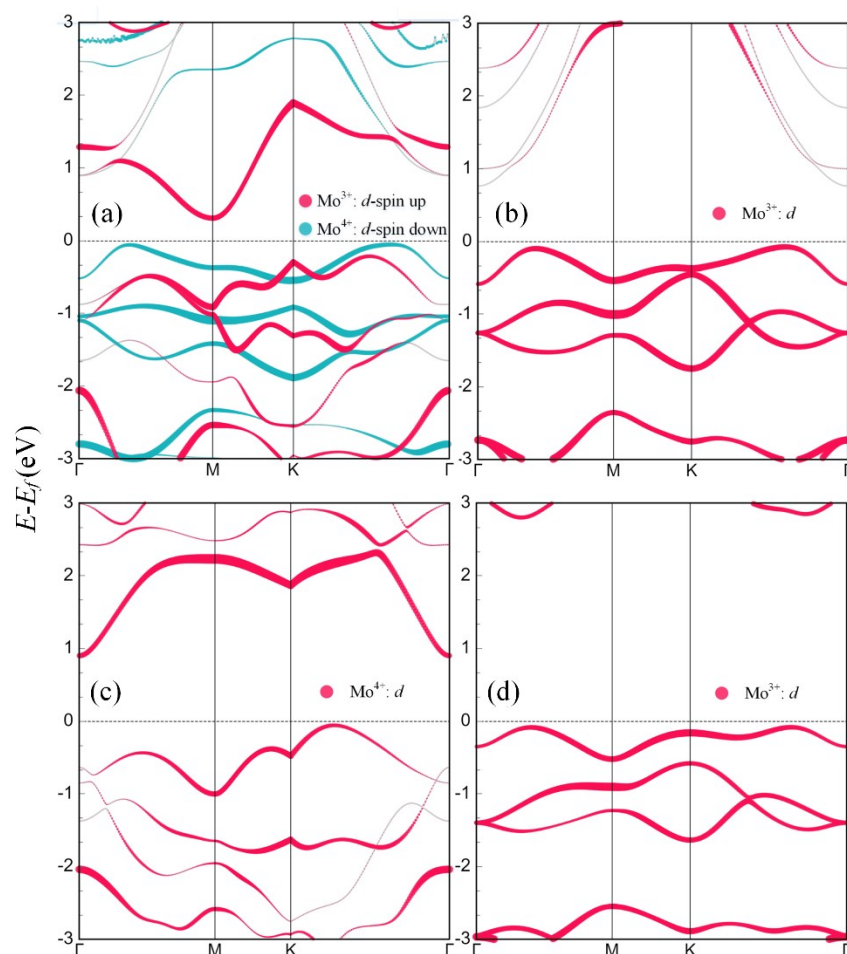

**Figure ESI14.** The spin polarized d orbital projected band structure of Mo ion for six functionalized Mo<sub>2</sub>C MXenes: asymmetry Janus (a) Mo<sub>2</sub>C-OOH, (b) Mo<sub>2</sub>C-(OH)<sub>2</sub>, (c) Mo<sub>2</sub>C-F<sub>2</sub>, and (d) Mo<sub>2</sub>C-O<sub>2</sub> and the Fermi level defines zero energy.

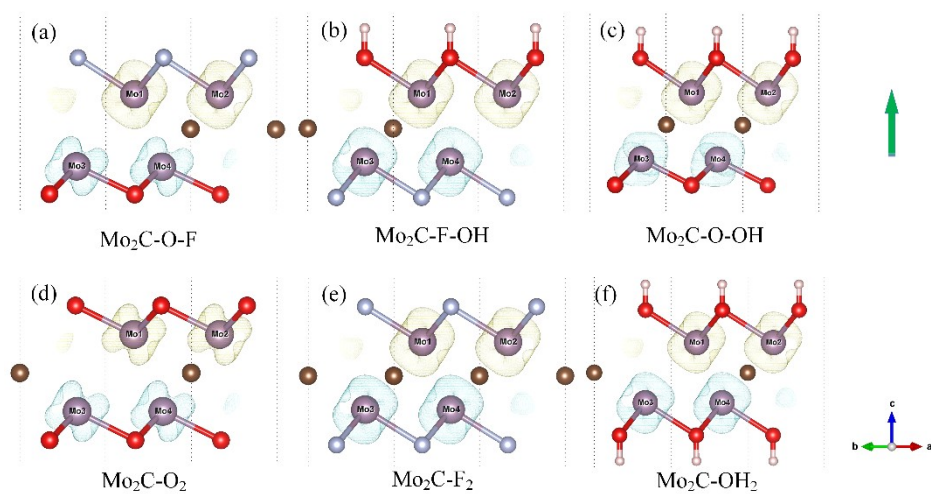

**Figure ESI15.** The spin density ( $\rho_{\uparrow} - \rho_{\downarrow}$ ) map of (a) Mo<sub>2</sub>C-FO; (b) Mo<sub>2</sub>C-F-OH; (c) Mo<sub>2</sub>C-O-OH; (d) Mo<sub>2</sub>C-F<sub>2</sub>; (e) Mo<sub>2</sub>C-O<sub>2</sub>; (f) Mo<sub>2</sub>C-(OH)<sub>2</sub>. The green arrow represents the direction of electric

polarization.

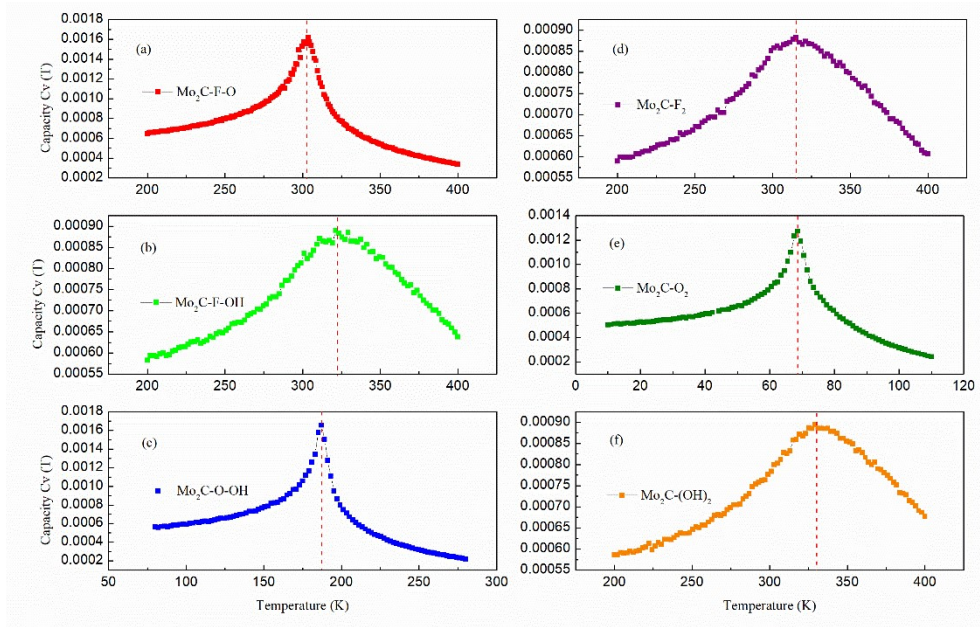

**Figure ESI6.** Specific heat  $C_v$  as a function of temperature for (a) Mo<sub>2</sub>C-FO; (b) Mo<sub>2</sub>C-F-OH; (c) Mo<sub>2</sub>C-O-OH; (d) Mo<sub>2</sub>C-F<sub>2</sub>; (e) Mo<sub>2</sub>C-O<sub>2</sub>; (f) Mo<sub>2</sub>C-(OH)<sub>2</sub>.

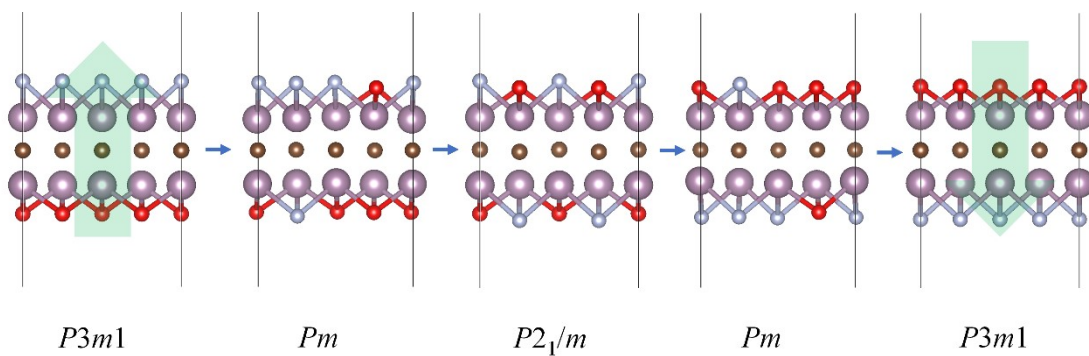

**Figure ESI7.** Side views of Mo<sub>2</sub>C-FO MXene lattice. Five phases include non-centrosymmetric  $P3m1$ ,  $Pm$  group, and centrosymmetric  $P2_1/m$ . The green arrow represents the direction of electric polarization.

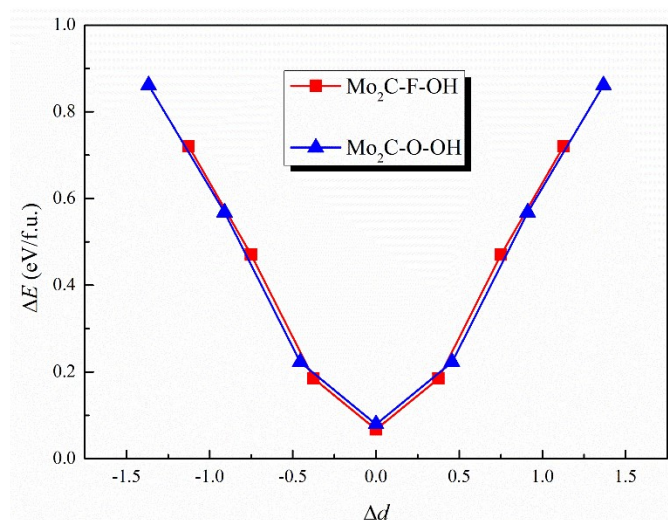

**Figure ES18.** Total energy as function of the difference of layer distance  $\Delta d$  for  $\text{Mo}_2\text{C-F-OH}$  and  $\text{Mo}_2\text{C-O-OH}$  system.

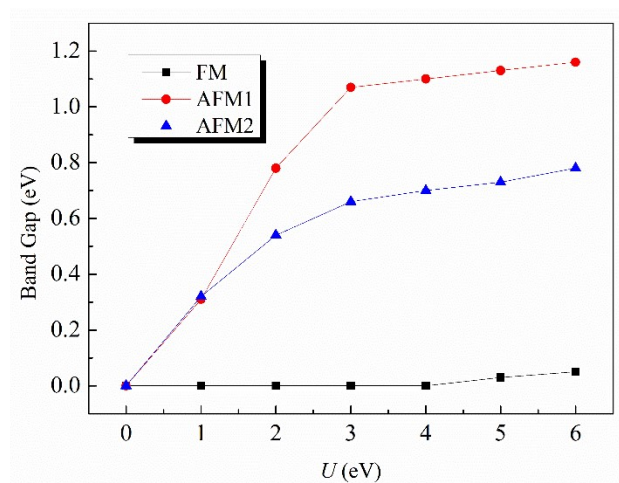

**Figure ES19.** Calculated band gap with different  $U_{\text{eff}}$  values of Mo ion for three magnetic structures (FM, AFM1, AFM2).

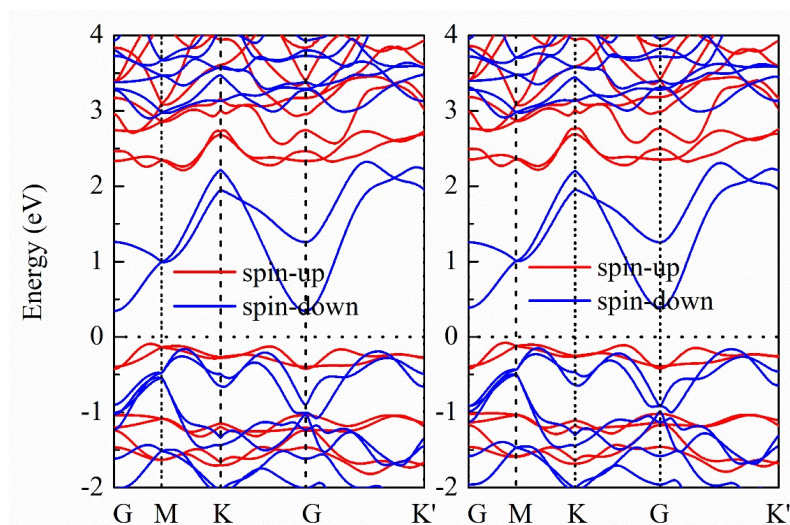

**Figure ES110.** The band structure of  $\text{Mo}_2\text{C-O-OH}$  calculated by (a) DFT-D2, (b) DFT-D3.

Tables

Table ESI1. Calculated total energy for three magnetic orders (FM, AFM1, AFM2) with different hubbard  $U$  values of Mo ion.

|      | $U=0$    | $U=1$    | $U=2$    | $U=3$    | $U=4$    | $U=5$    | $U=6$    |
|------|----------|----------|----------|----------|----------|----------|----------|
| FM   | -91.4869 | -86.5886 | -81.6545 | -76.7160 | -72.9473 | -68.6091 | -65.9987 |
| AFM1 | -91.4864 | -86.4594 | -81.6256 | -76.9326 | -72.9659 | -69.5811 | -66.6318 |
| AFM2 | -91.4871 | -86.5888 | -81.7033 | -76.8244 | -72.7801 | -69.3298 | -66.4711 |

Table ESI2. Calculated magnetic moments for three magnetic orders (FM, AFM1, AFM2) with different hubbard  $U$  values of Mo ion.

|                           | $U=0$ | $U=1$ | $U=2$     | $U=3$      | $U=4$      | $U=5$      | $U=6$      |
|---------------------------|-------|-------|-----------|------------|------------|------------|------------|
| (Mo1/Mo2) <sub>FM</sub>   | 0/0   | 0/0   | 0.22/0.22 | 0.44/1.45  | 2.41/-1.61 | 2.87/2.30  | 3.03/1.98  |
| (Mo1/Mo2) <sub>AFM1</sub> | 0/0   | 0/0   | 0/0       | 1.32/-0.92 | 2.18/-1.72 | 2.76/-1.86 | 2.94/-2.03 |
| (Mo1/Mo2) <sub>AFM2</sub> | 0/0   | 0/0   | 0.03/0    | 0.17/-0.17 | 2.15/-1.74 | 2.75/-1.85 | 2.90/-1.97 |

Table ESI3 Vacuum-level, level shift, and work function for six functionalized Mo<sub>2</sub>C-MXenes.

| MXenes                            | 1 Vacuum-Level (eV) | 2 Vacuum-Level (eV) | level shift ( $\Delta$ ) | Work Function (eV) |
|-----------------------------------|---------------------|---------------------|--------------------------|--------------------|
| Mo <sub>2</sub> C-F-O             | 3.916               | 3.204               | 0.712                    | 6.250              |
| Mo <sub>2</sub> C-F-OH            | 4.880               | 0.808               | 4.072                    | 5.945              |
| Mo <sub>2</sub> C-O-OH            | 5.572               | 0.694               | 4.878                    | 6.315              |
| Mo <sub>2</sub> C-F <sub>2</sub>  | 3.259               | 3.259               | 0.000                    | 5.847              |
| Mo <sub>2</sub> C-O <sub>2</sub>  | 3.808               | 3.808               | 0.000                    | 6.294              |
| Mo <sub>2</sub> C-OH <sub>2</sub> | 2.451               | 2.451               | 0.000                    | 1.842              |

Table ESI4. Calculated lattice parameters ( $\text{\AA}$ ) and band gap (eV) for DFT-D2 and DFT-D3 vdw correction.

| Vdw    | $a$  | $b$  | Band gap |
|--------|------|------|----------|
| DFT-D2 | 3.29 | 3.19 | 0.36     |
| DFT-D3 | 3.28 | 3.18 | 0.43     |
